# Supplementary material
Source: PubMed Central journal article supplement (PMC4151212)

|                                                            | <b>Age<br/>(weeks)</b> | <b>Controls<br/>(n=9-21)</b> | <b><i>Sf1-Ptpn1<sup>-/-</sup></i><br/>(n=4-9)</b> | <b>p-value</b> |
|------------------------------------------------------------|------------------------|------------------------------|---------------------------------------------------|----------------|
| <b>Blood glucose (mg/dl) in fed state</b>                  | 18                     | 141 ± 5                      | 143 ± 5                                           | 0.85           |
| <b>Blood glucose (mg/dl) 5 hrs after<br/>food removal</b>  | 14                     | 137 ± 3                      | 141 ± 5                                           | 0.11           |
|                                                            | <b>16</b>              | <b>142 ± 6</b>               | <b>170 ± 7</b>                                    | <b>0.042</b>   |
|                                                            | <b>27</b>              | <b>130 ± 8</b>               | <b>172 ± 2</b>                                    | <b>0.026</b>   |
|                                                            | 28                     | 143 ± 1                      | 162 ± 2                                           | 0.29           |
| <b>Plasma insulin (ng/ml) 5 hrs after<br/>food removal</b> | <b>28</b>              | <b>0.30 ± 0.07</b>           | <b>0.99 ± 0.34</b>                                | <b>0.015</b>   |

**Supplemental Table 1.** Blood glucose and plasma insulin levels in female mice on HFD in the fed state at 10 am and 5 hours after food removal. Data are means ± SEM. The values in bold and italics are statistically different between genotypes.

*Ptpn1*<sup>+/+</sup>

*Ptpn1*<sup>-/-</sup>

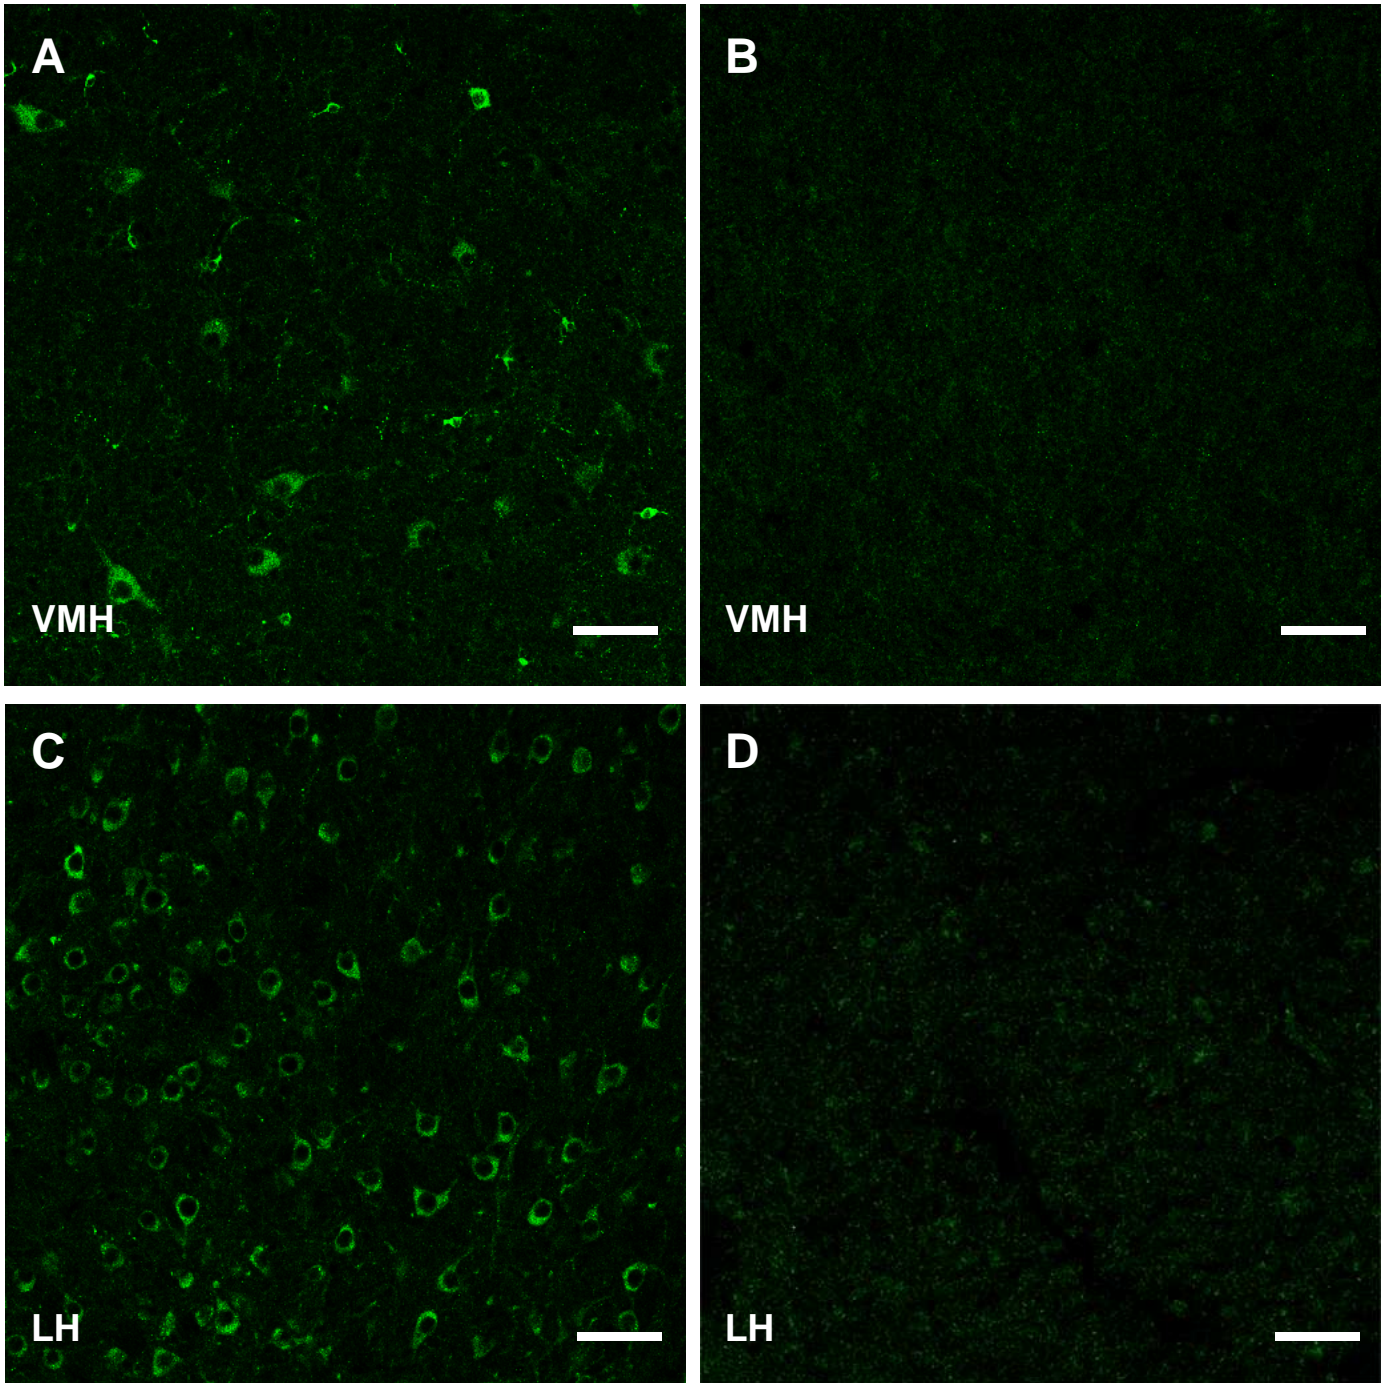

**Supplemental Figure 1. PTP1B expression in wild-type mice.** Immunostaining of coronal sections of hypothalami from *Ptpn1*<sup>+/+</sup> (A, C) and *Ptpn1*<sup>-/-</sup> (B, D) mice shows PTP1B levels in VMH (A, B) and LH (C, D) neurons and demonstrates specificity of anti-PTP1B antibodies. Scale bars: 50µm. Original magnification: x20

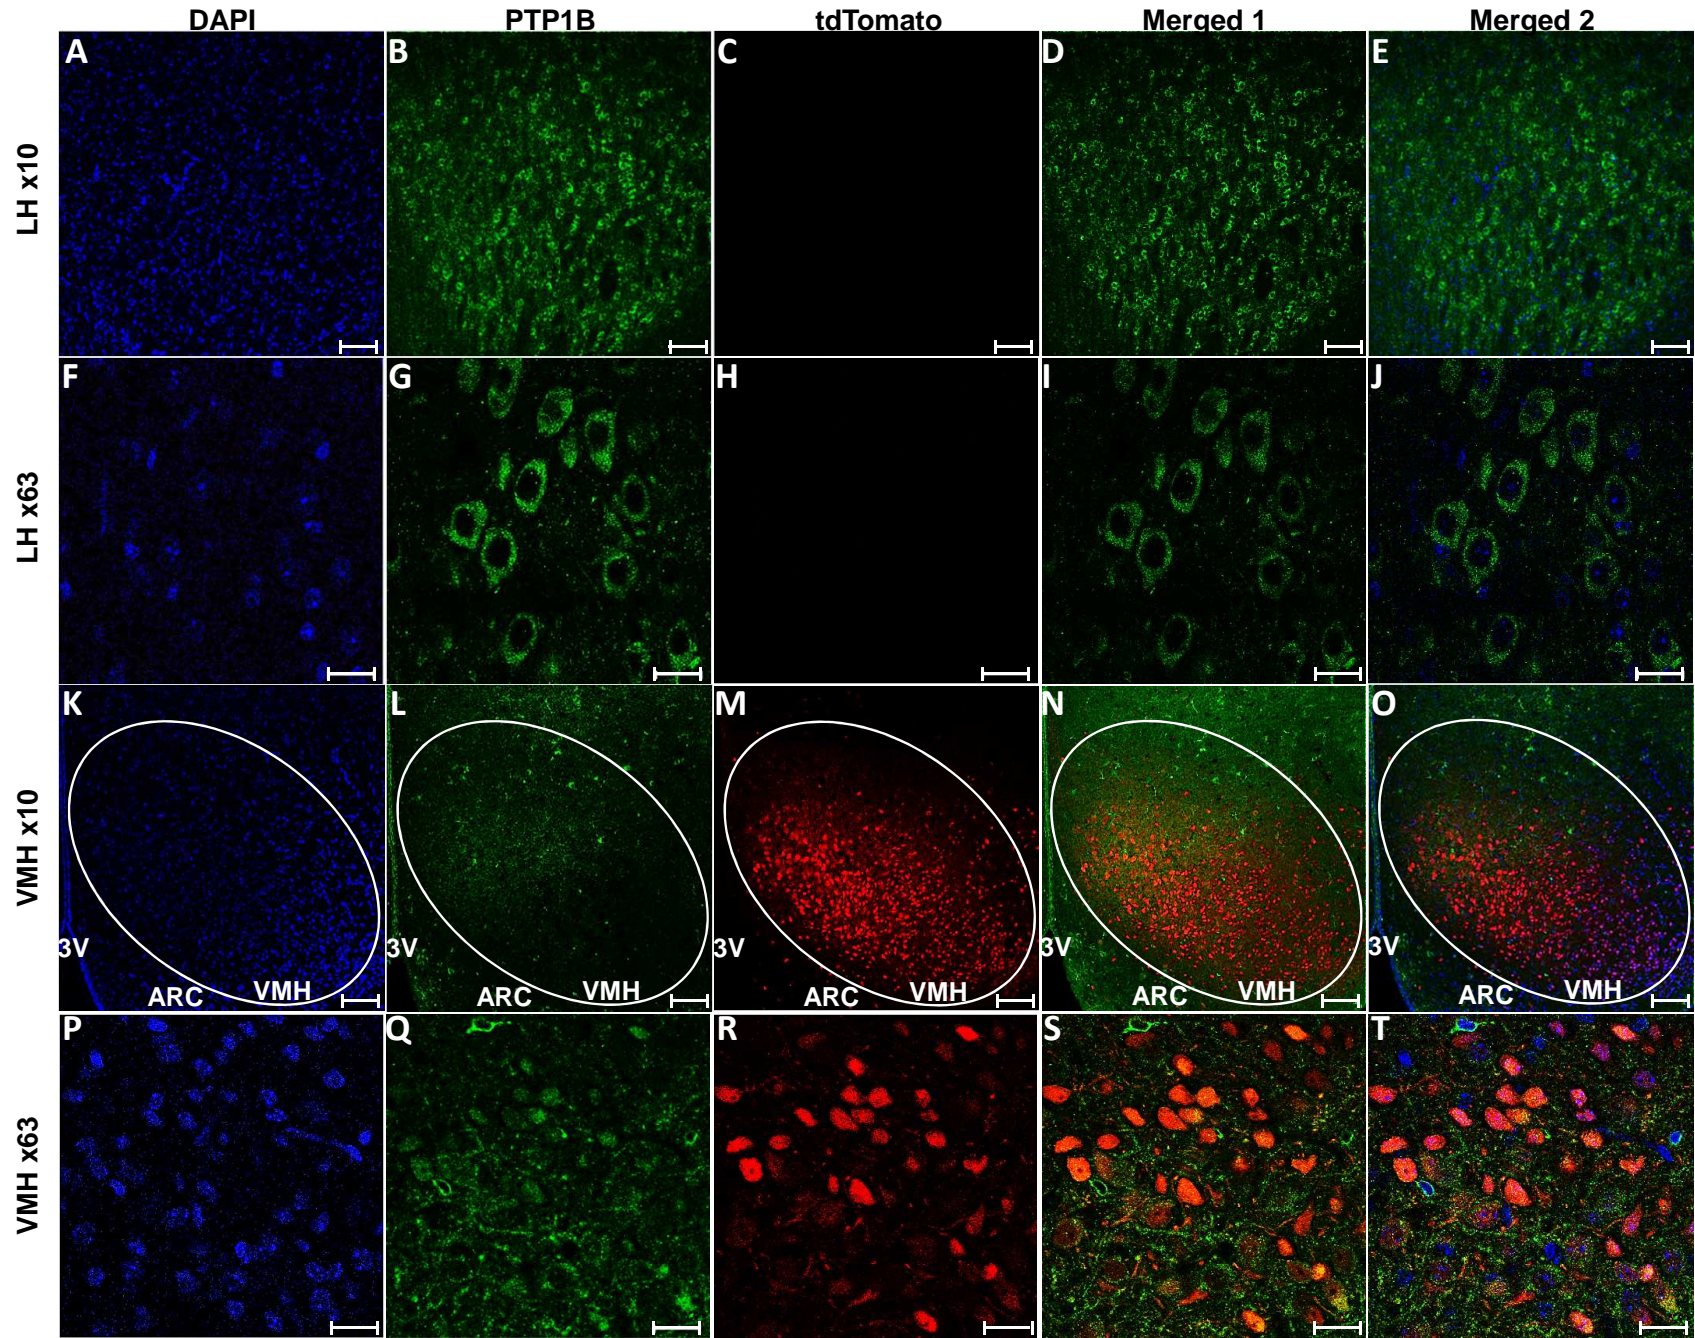

**Supplemental Figure 2. PTP1B is expressed in VMH and LH neurons of *Sf1-Cre:Ptpn1<sup>lox/+</sup>:Isl-tdTomato* mice.** Coronal sections of hypothalami from *Sf1-Cre:Ptpn1<sup>lox/+</sup>:Isl-tdTomato* mice showing immunostaining for PTP1B (green) and tdTomato (red). Panels A-J and K-T demonstrate that PTP1B is expressed in LH and VMH neurons, respectively. Note the absence of tdTomato fluorescence in LH sections indicating the absence of *Sf1-Cre* expression in LH, which lacks *Sf1* neurons. All immunofluorescence was performed on the same brains. These images are representative of data on 3 brains. **A, F, K** and **P** show DAPI staining of cell nuclei. Merged 1 corresponds to the overlay of the anti-PTP1B (green) and tdTomato (red) images. Merged 2 corresponds to the overlay of the DAPI, anti-PTP1B (green) and tdTomato (red) images. Scale bars: 100 $\mu$ m (**A-E, K-O**); 20 $\mu$ m (**F-J, P-T**). Original magnification: x10 (**A-E, K-O**); x63 (**F-J, P-T**).

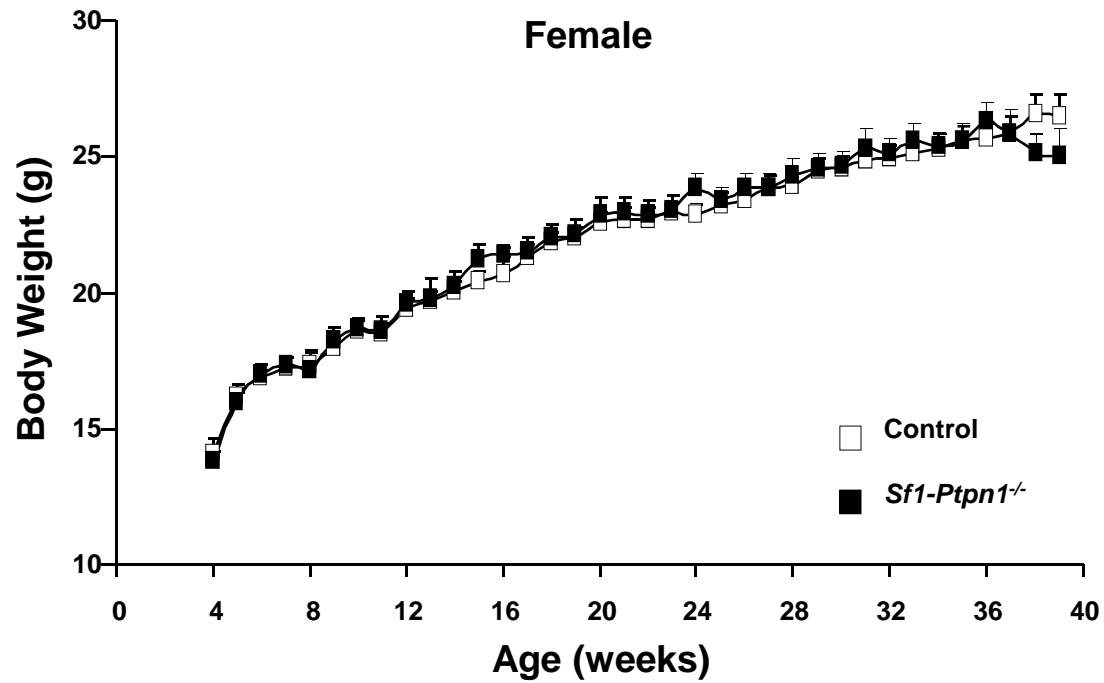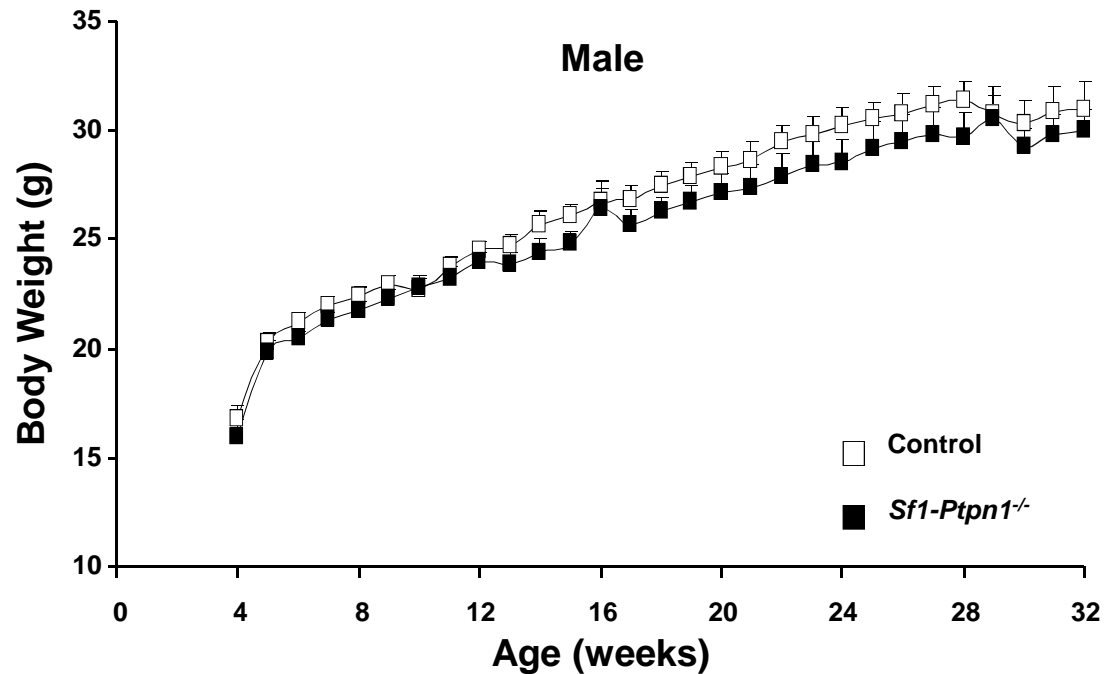

**Supplemental Figure 3.** *Sf1-Ptpn1*<sup>-/-</sup> mice have normal body weight on chow diet. Data shown are means ± SEM. n=11-22 per group.

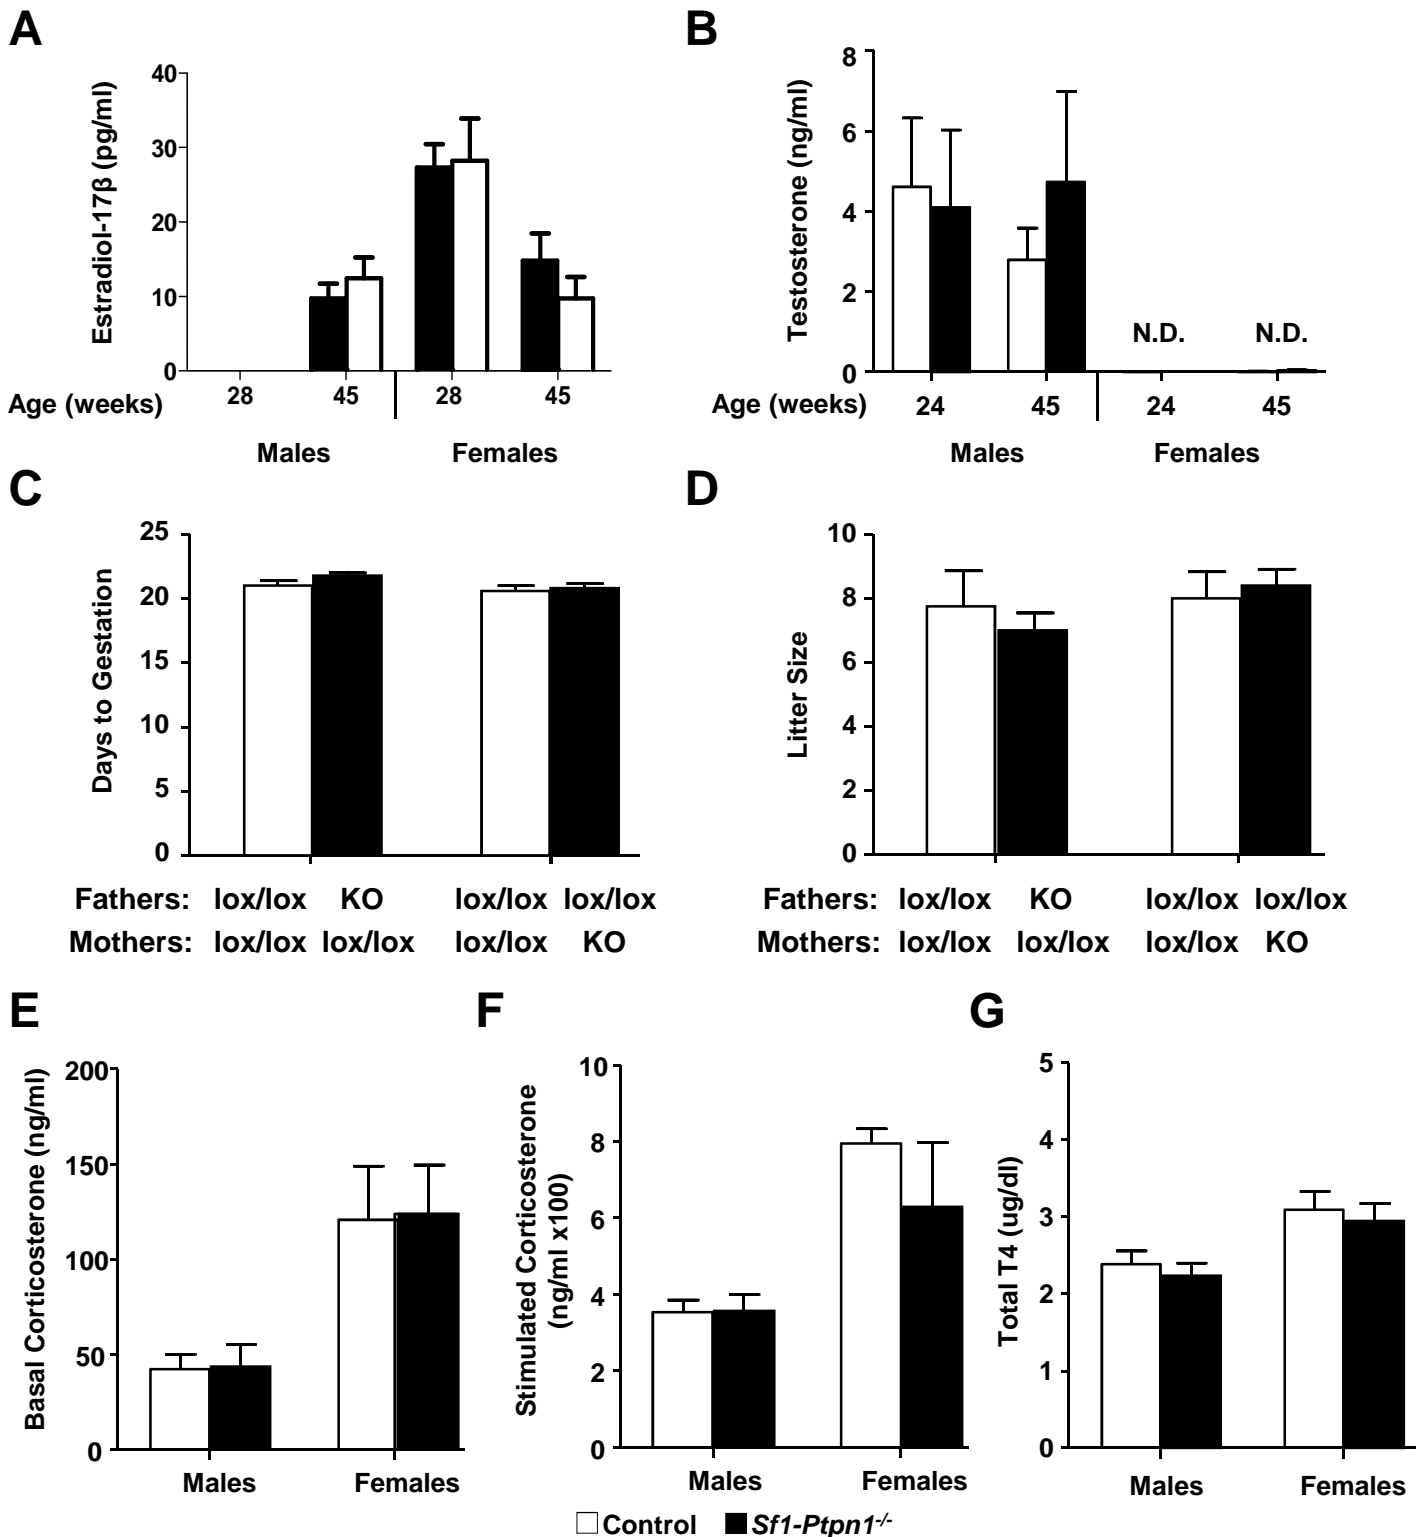

**Supplemental Figure 4. Reproductive function and hormone levels are normal in *Sf1-Ptpn1*<sup>-/-</sup> mice on HFD. (A)** Serum estradiol-17 $\beta$  levels at 28 and 45 weeks (n=6-16 per group). **(B)** Serum testosterone levels at 24 weeks (n=4-11) and 45 weeks (n=6-17); ND=not detected. **(C)** Days to gestation and **(D)** litter size for the indicated breeding pairs (n=5 per genotype combination). **(E)** Basal serum corticosterone, **(F)** serum corticosterone after 15 min of restraint, and **(G)** serum T4 levels (n=4-8). Data shown are means  $\pm$  SEM.

**A**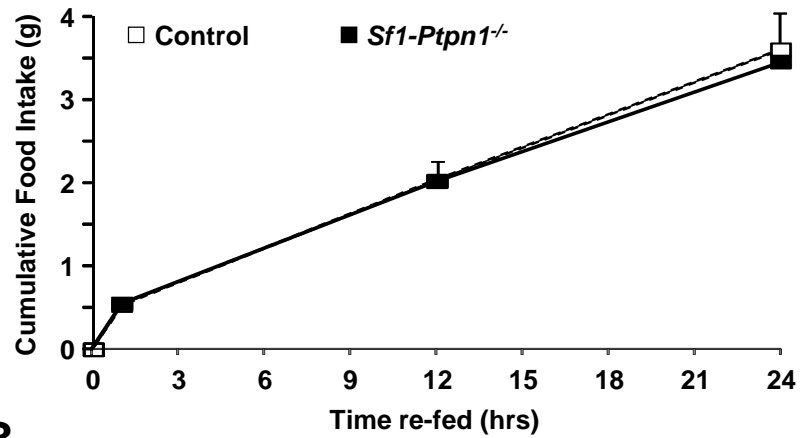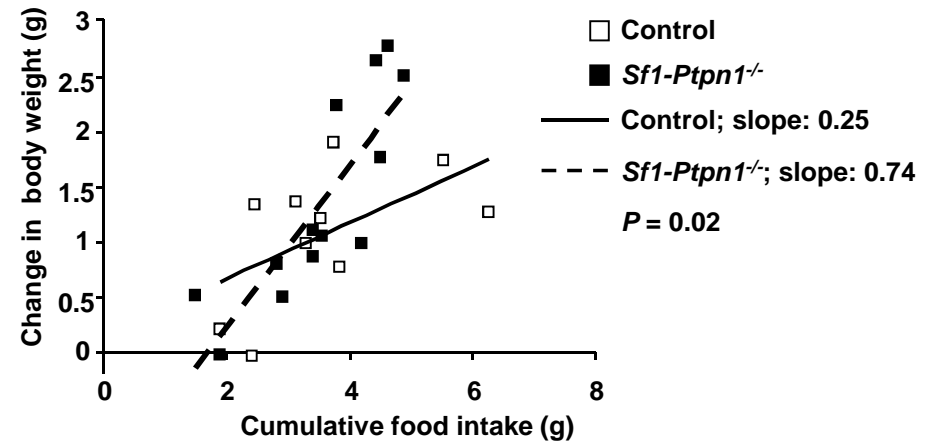**B**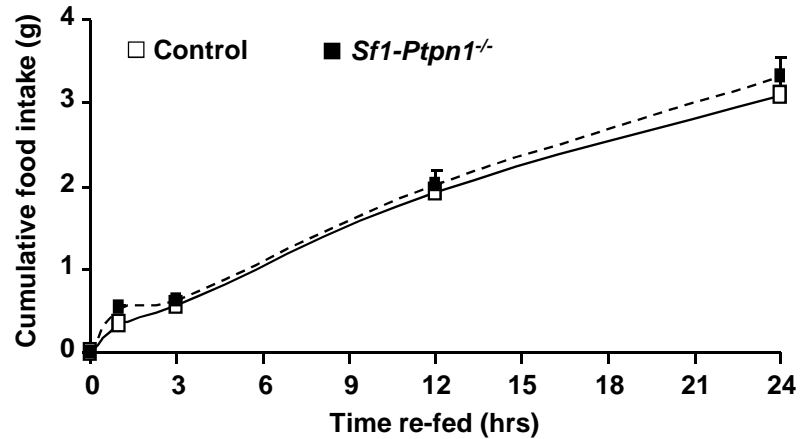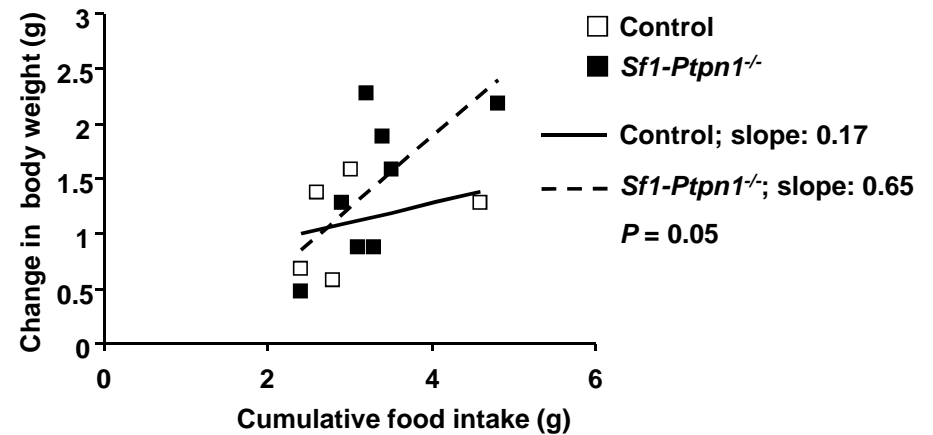

**Supplemental Figure 5. *Sf1-Ptpn1<sup>-/-</sup>* mice have increased feed efficiency.** (A) Cumulative food intake after 24h fast, followed by re-feeding of HFD for the indicated times (left panel); and feed efficiency during 24h of re-feeding (right panel) HFD to 18-20 week-old female mice (before body weight divergence);  $n=10-13$ . (B) The same experiment as in (A) was repeated in 36 week-old female mice;  $n=5-8$ . Slopes are compared by ANCOVA. Data represent means  $\pm$  SEM.

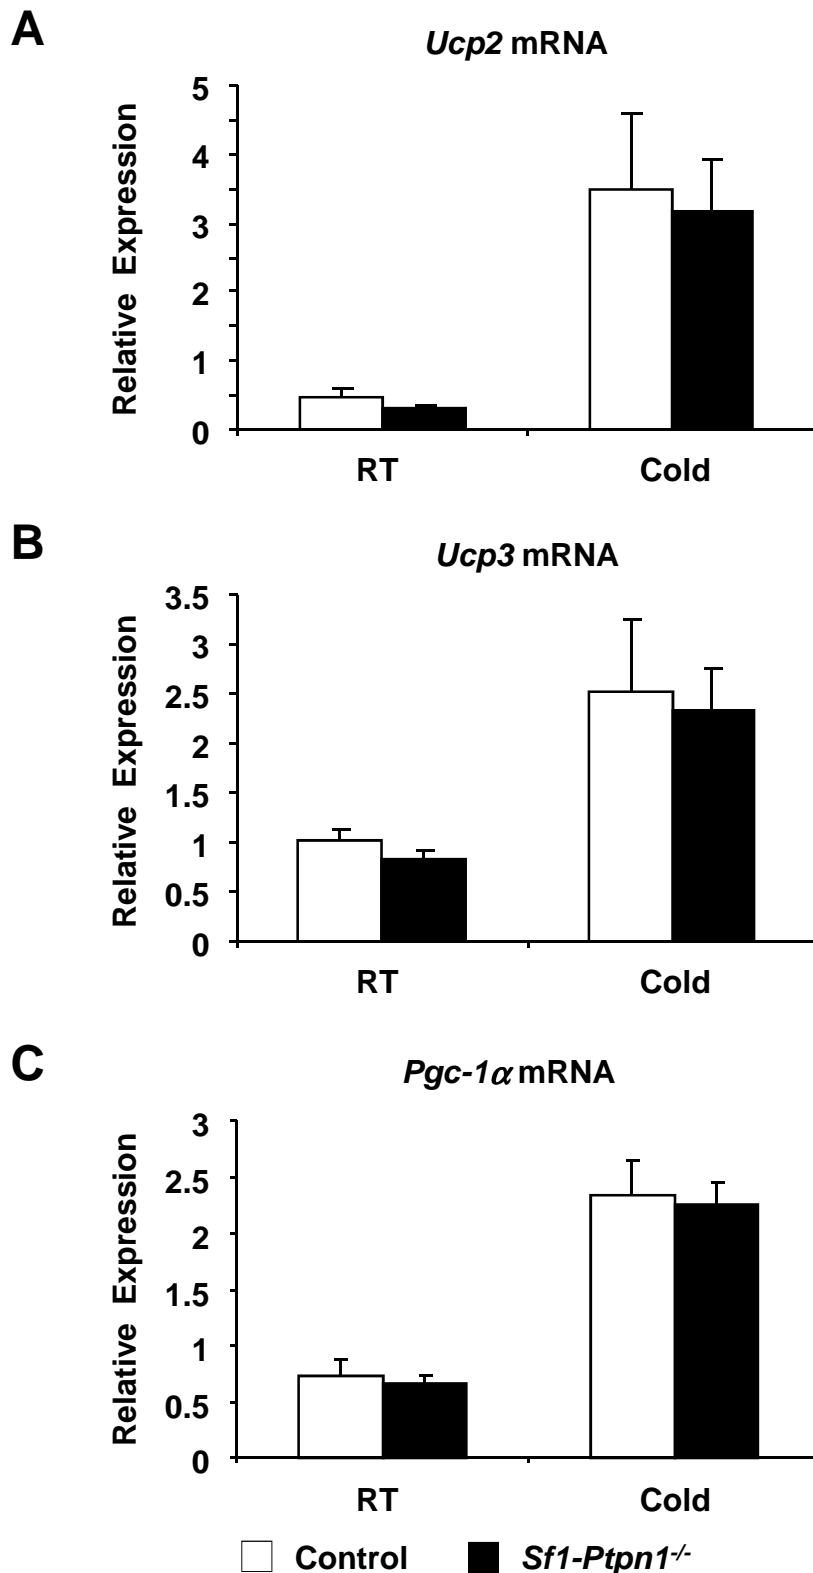

**Supplemental Figure 6. *Sf1-Ptpn1*<sup>-/-</sup> mice show normal expression of genes involved in thermogenesis. (A) *Ucp2*, (B) *Ucp3*, and (C) *Pgc-1α* mRNA levels in BAT from Control and *Sf1-Ptpn1*<sup>-/-</sup> mice at room temperature (RT) and after 3 days of cold exposure (4°C). All mice are females on HFD at 33-35 weeks of age. Data represent means ± SEM. n=5/8 per genotype.**

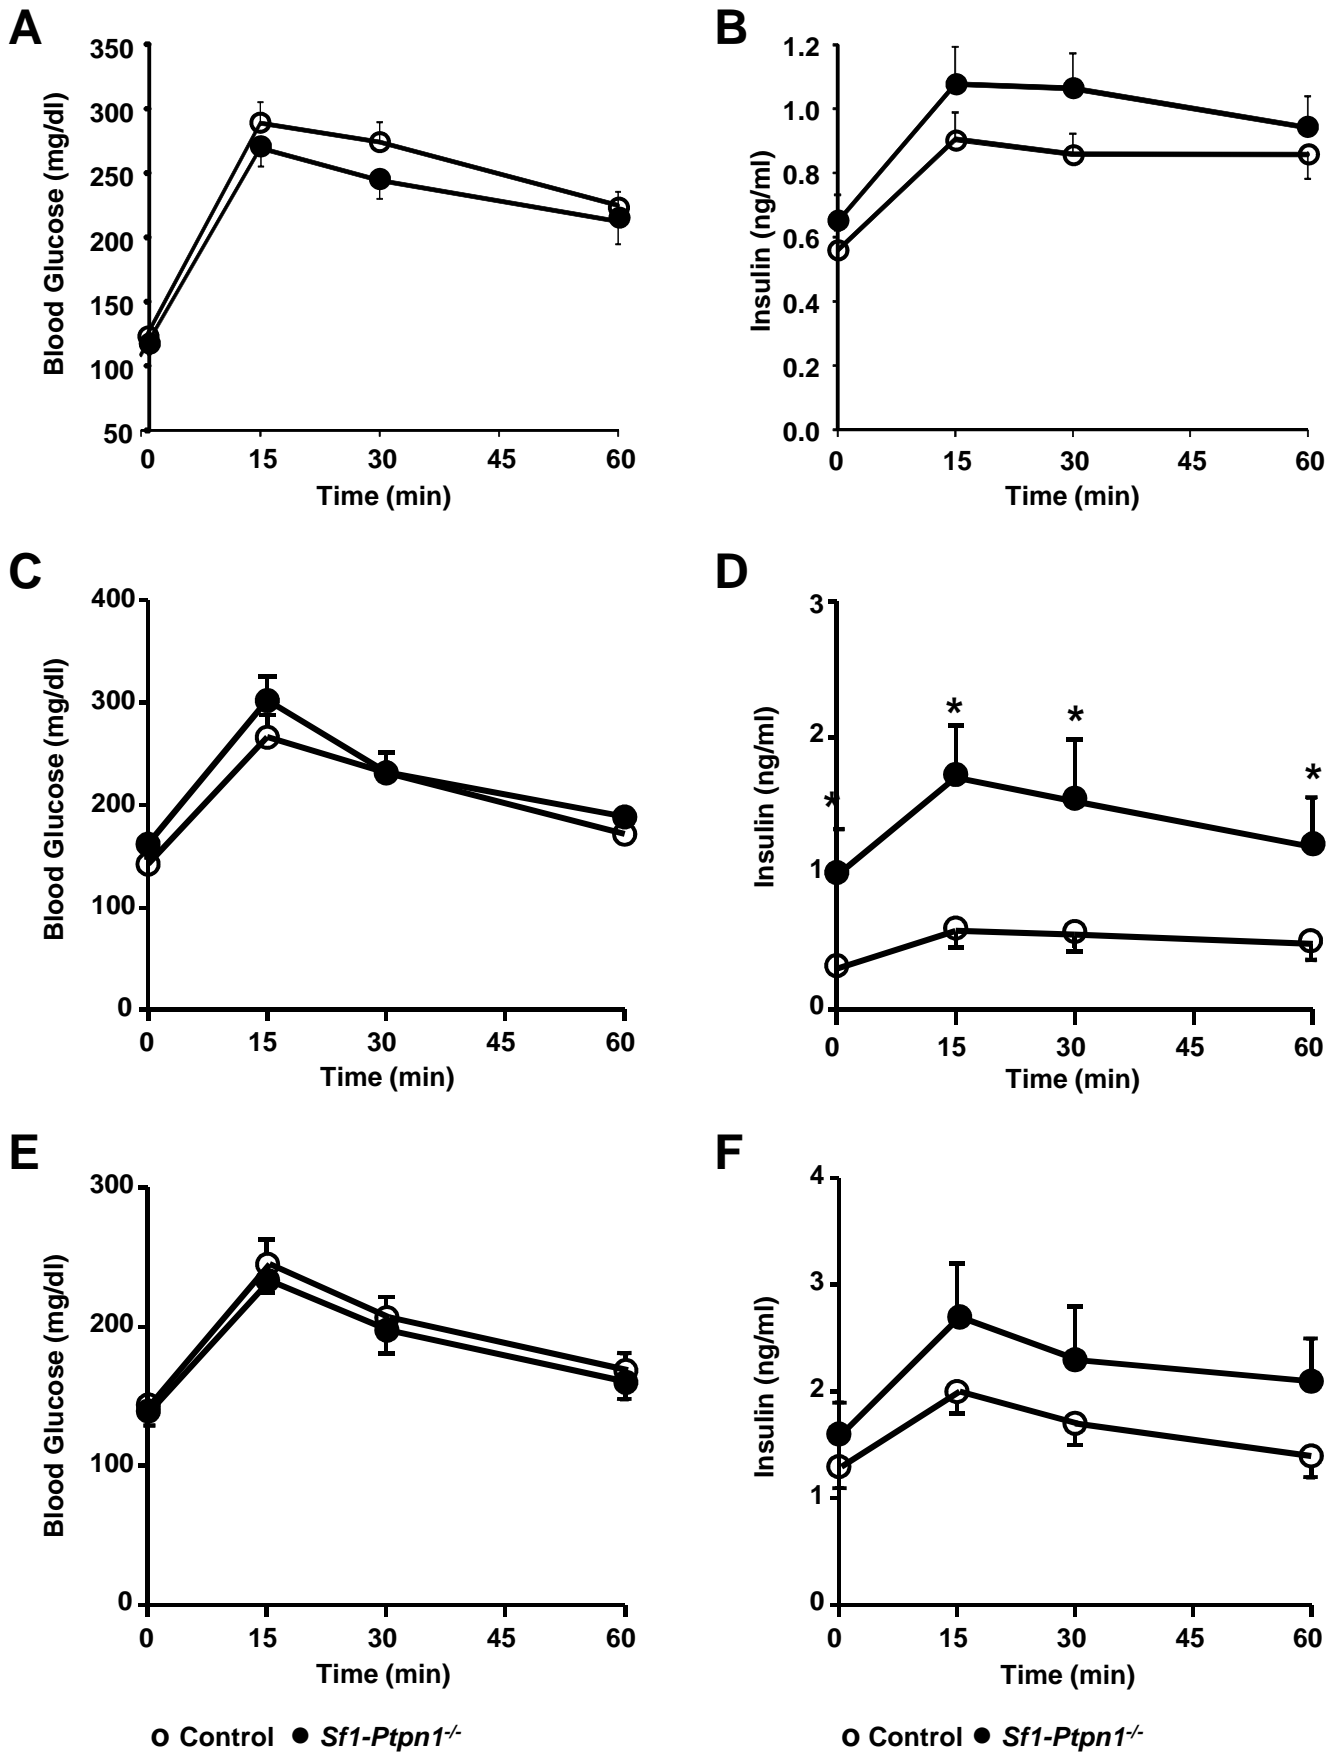

**Supplemental Figure 7. Glucose and insulin levels during glucose tolerance tests in *Sf1-Ptpn1*<sup>-/-</sup> mice.** Blood glucose response and insulin release during glucose tolerance tests (1mg/kg IP) performed at 18 weeks (A, B; n=16 per group), 28 weeks (C, D; n=4-10), and 45 weeks of age (E, F; n=9-18). All mice were females on HFD. Data are means ± SEM. \**P* < 0.05 by unpaired *t* test.



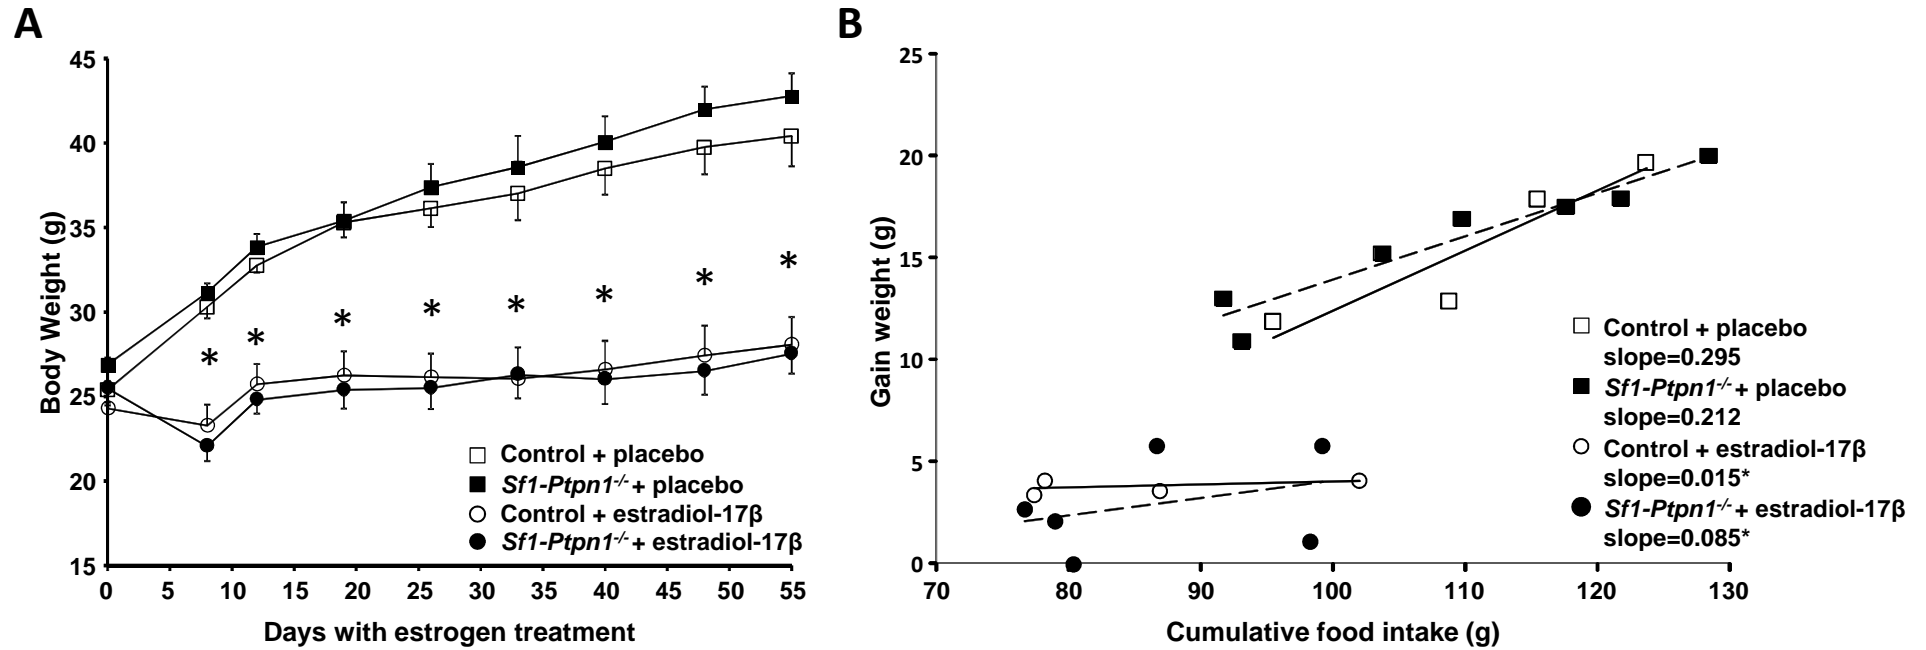

**Supplemental Figure 8. Estradiol-17β treatment causes weight loss and decreased feed efficiency in Control and *Sf1-Ptpn1*<sup>-/-</sup> male mice on HFD. (A)** Body weights on HFD of Control (open squares, n=5) and *Sf1-Ptpn1*<sup>-/-</sup> (black squares, n=7) male mice, treated with placebo, and Control (open circle, n=4) and *Sf1-Ptpn1*<sup>-/-</sup> (black circle, n=7) mice, treated with subcutaneous estrogen pellet (2μg/day/mouse). Data represent means ± SEM. \**P* < 0.05 for placebo versus estrogen groups for each genotype, using ANOVA with unpaired *t*-test for individual comparisons. **(B)** Feed efficiency in HFD-fed Control and *Sf1-Ptpn1*<sup>-/-</sup> male mice administered placebo or subcutaneous estrogen pellet. \**P* < 0.05 versus the respective placebo group for each genotype; slopes compared by ANCOVA.

**A**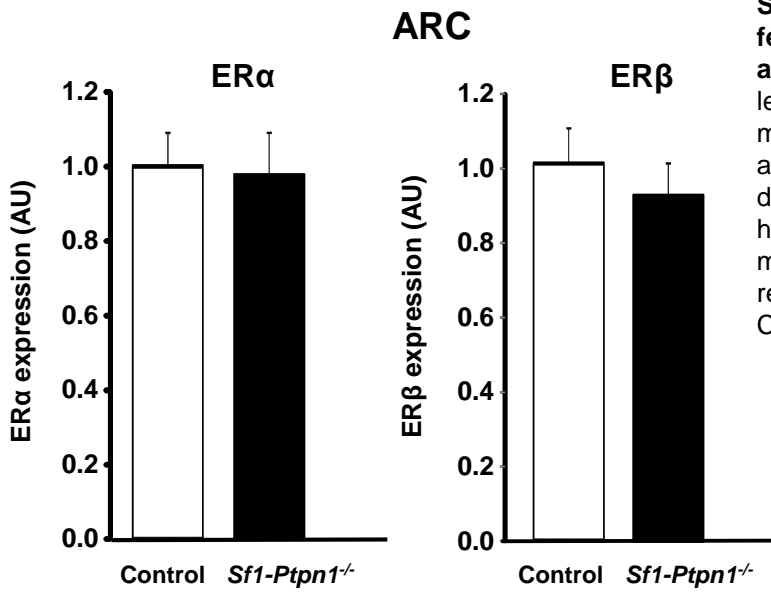

**Supplemental Figure 9. Increased adiposity in female *Sf1-Ptpn1*<sup>-/-</sup> cannot be explained by altered hypothalamic ER levels.** ER $\alpha$  and ER $\beta$  levels in hypothalamic nuclei of female *Sf1-Ptpn1*<sup>-/-</sup> mice on HFD. ER $\alpha$  and ER $\beta$  mRNA levels in (A) arcuate (ARC), (B) paraventricular (PVN) and (C) dorso- and ventromedial (DMH/VMH) nuclei of the hypothalamus of Control and *Sf1-Ptpn1*<sup>-/-</sup> female mice on HFD were quantified by RT-qPCR. Data represent means of gene expression/18S  $\pm$  SEM. Controls, n=6; *Sf1-Ptpn1*<sup>-/-</sup>, n=8.

**B**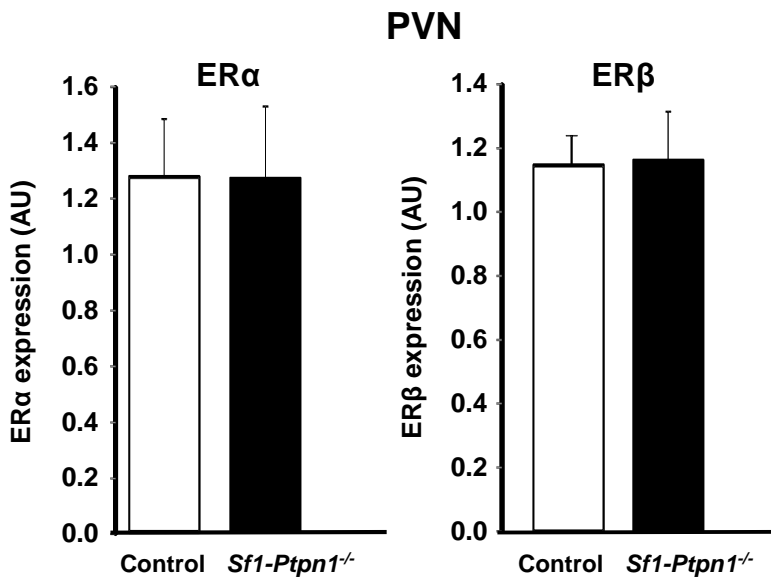**C**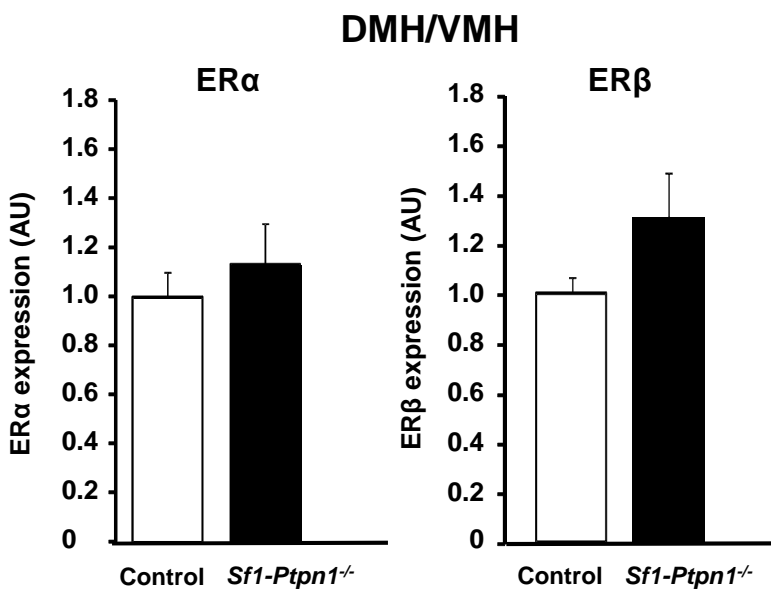

Supplement: JCI68585sd.pdf [file JCI68585sd.pdf]
